# Supplementary material
Source: Springer Nature journal article supplement (https://www.springermedizin.de/resource/supplementary/12935_2003_34_MOESM4_ESM.pdf/9540904)

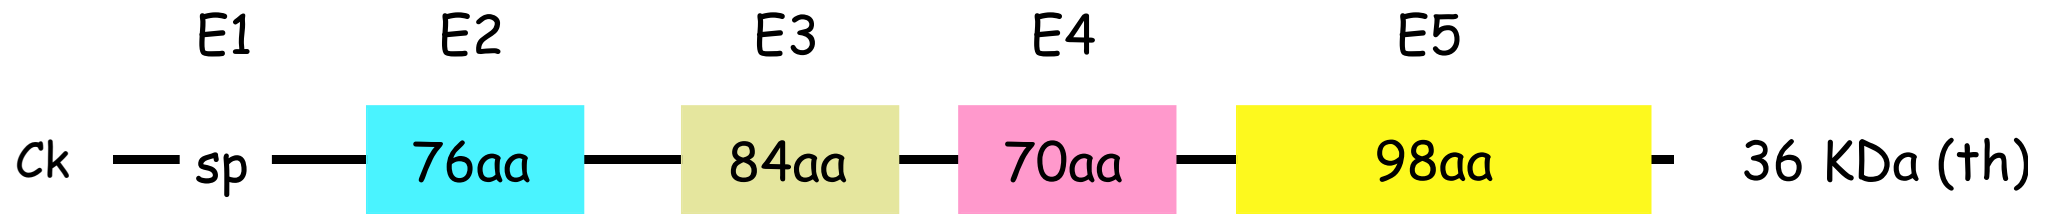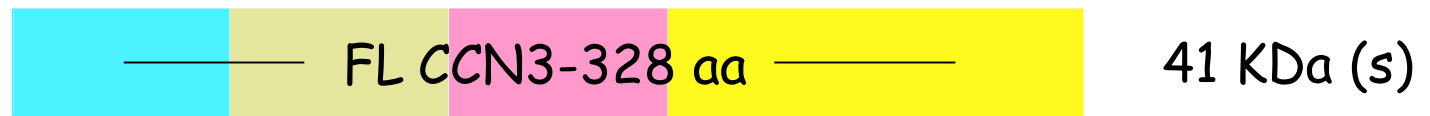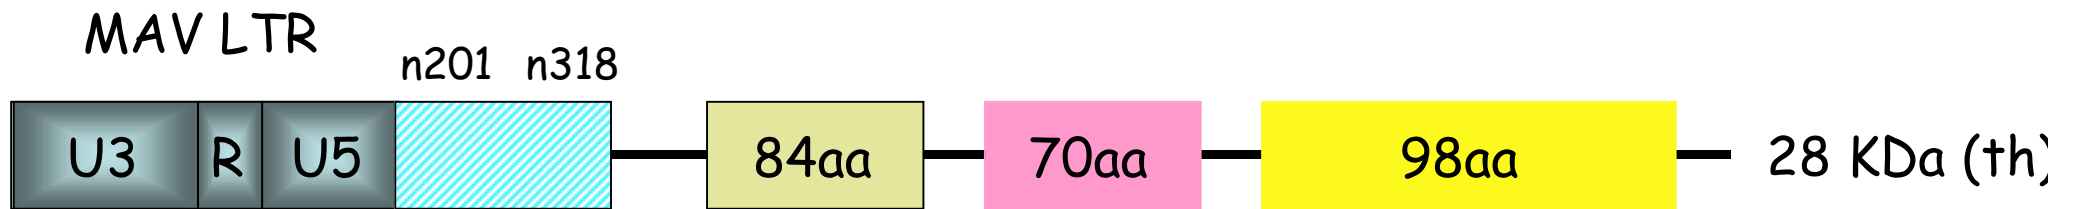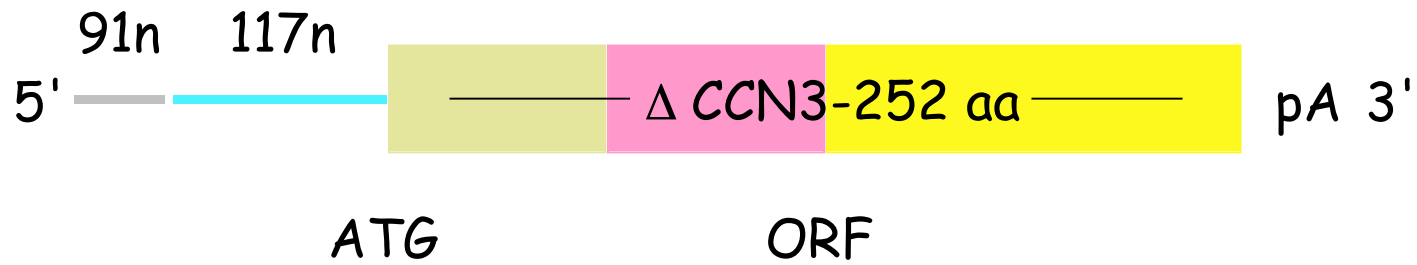

Supplement: MOESM4 [file 9540904]
